# Supplementary material for: Heteropolytungstic acids incorporated in an ordered mesoporous zirconia framework as efficient oxidation catalysts
Source: Royal Society of Chemistry journal article supplement (doi:10.1039/c3ra46421k), 2014-01-01
Supplement: c3ra46421k.pdf [file c3ra46421k.pdf]

## Electronic Supporting Information

# Heteropolytungstic Acids Incorporated in Ordered Mesoporous Zirconia Framework as Efficient Oxidation Catalysts

Euaggelia Skliri<sup>a</sup>, Ioannis N. Lykakis<sup>b</sup>, Gerasimos S. Armatas<sup>\*a</sup>

<sup>a</sup> *Department of Materials Science and Technology, University of Crete, Voutes 71003, Heraklion, Greece.*

<sup>b</sup> *Department of Chemistry, Aristotle University of Thessaloniki, University Campus 54124, Thessaloniki, Greece.*

\*E-mail: garmatas@materials.uoc.gr.

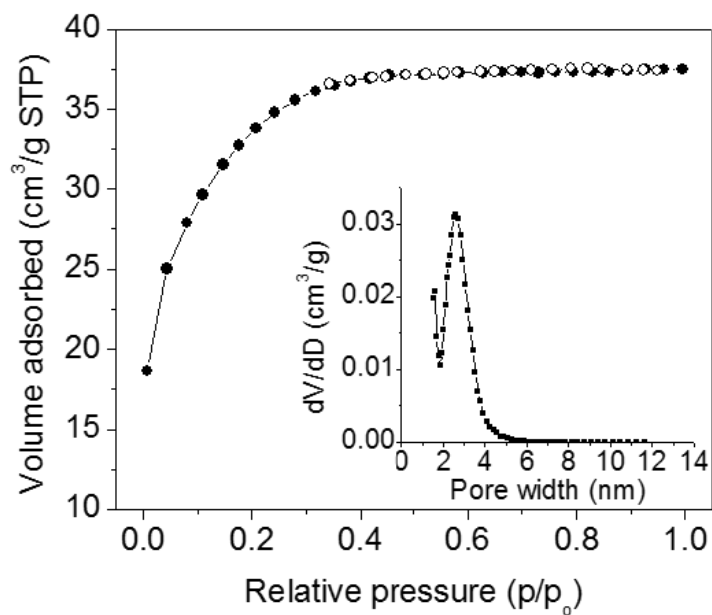

**Fig. S1** Nitrogen adsorption and desorption isotherms at 77K of mesoporous zirconia (*meso*-ZrO<sub>2</sub>). Analysis of the adsorption data with the BET method gives surface area of 118 m<sup>2</sup>g<sup>-1</sup> and pore volume of 0.06 cm<sup>3</sup>g<sup>-1</sup>. Inset: the NLDFT pore size distribution calculated from the adsorption branch, indicating mesopore diameter of 2.5 nm.

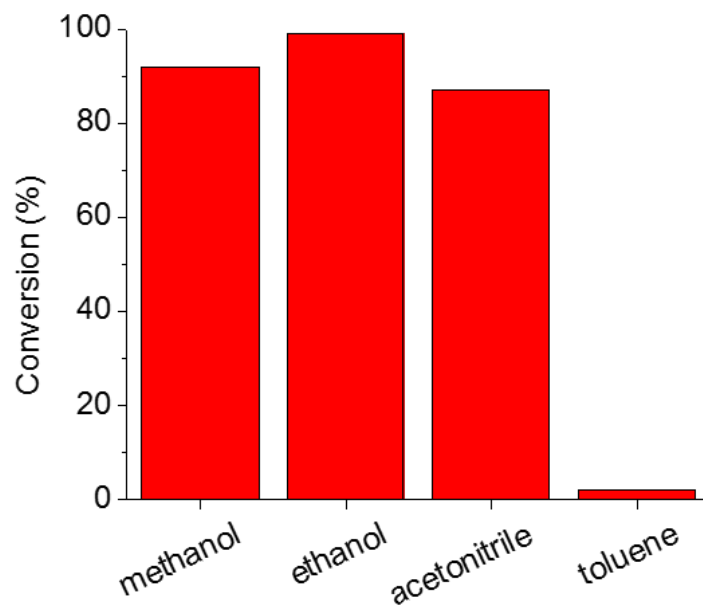

**Fig. S2** Oxidation of 1,1-diphenyl-2-methylpropene over ZrSTA(5) catalyst in different media.  
*Experimental conditions:* 0.1 mmol substrate, 0.5 mmol catalyst (containing 2 mol% STA), 3 equiv.  $\text{H}_2\text{O}_2$  (30% in water), 3 mL ethanol, 50 °C, 1 h.

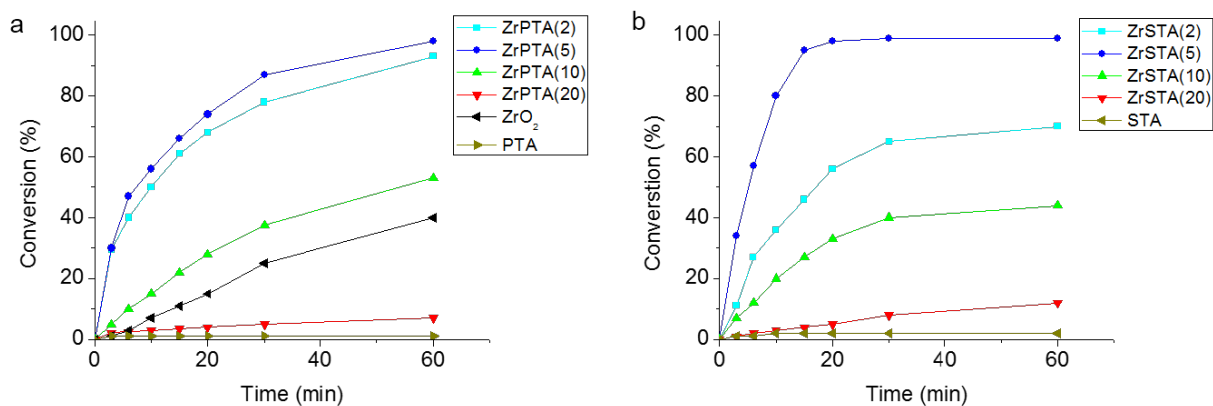

**Figure S3.** Time evolution of 1,1-diphenyl-2-methylpropene oxidation catalyzed by hydrogen peroxide using mesoporous zirconia (*meso*-ZrO<sub>2</sub>), ZrPTA(*w*) and ZrSTA(*w*) materials and PTA (H<sub>3</sub>PW<sub>12</sub>O<sub>40</sub>) and STA (H<sub>4</sub>SiW<sub>12</sub>O<sub>40</sub>) compounds as catalysts.

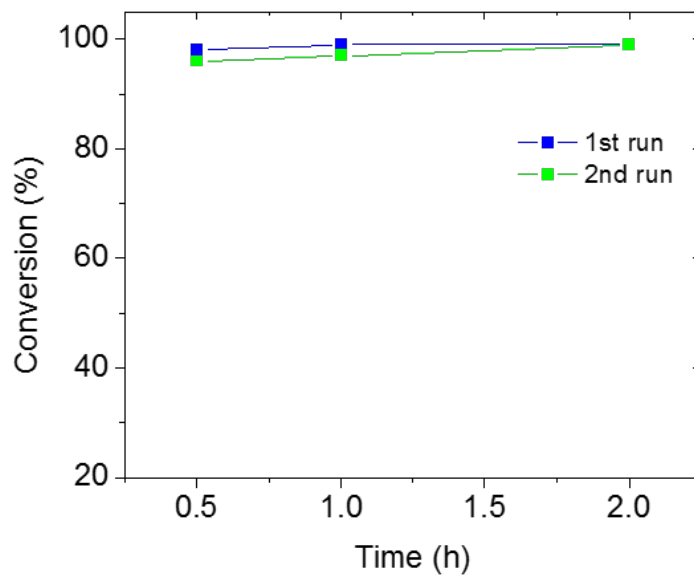

**Figure S4.** Recycling study of the mesoporous ZrSTA(5) catalyst (*experimental conditions:* 0.1 mmol of 1,1-diphenyl-2-methylpropene, 0.5 mmol of catalyst (containing 2 mol% STA), 3 equivalent of H<sub>2</sub>O<sub>2</sub> (30% in water), 3 mL of ethanol, 50 °C).

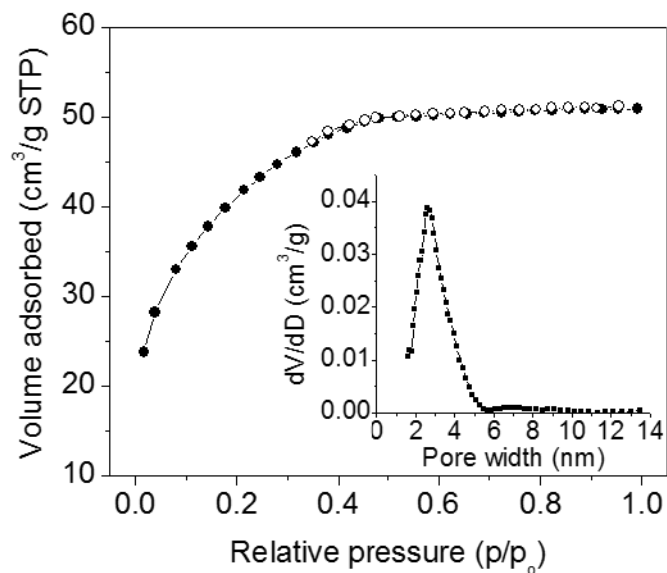

**Figure S5.** N<sub>2</sub> adsorption and desorption isotherms at 77K of reused ZrSTA(5) catalyst. Analysis of the adsorption data with the BET method gives surface area of 149 m<sup>2</sup>g<sup>-1</sup> and total pore volume of 0.08 cm<sup>3</sup>g<sup>-1</sup>. Inset: the corresponding NLDFT pore size distribution, indicating pore size of ~2.6 nm.

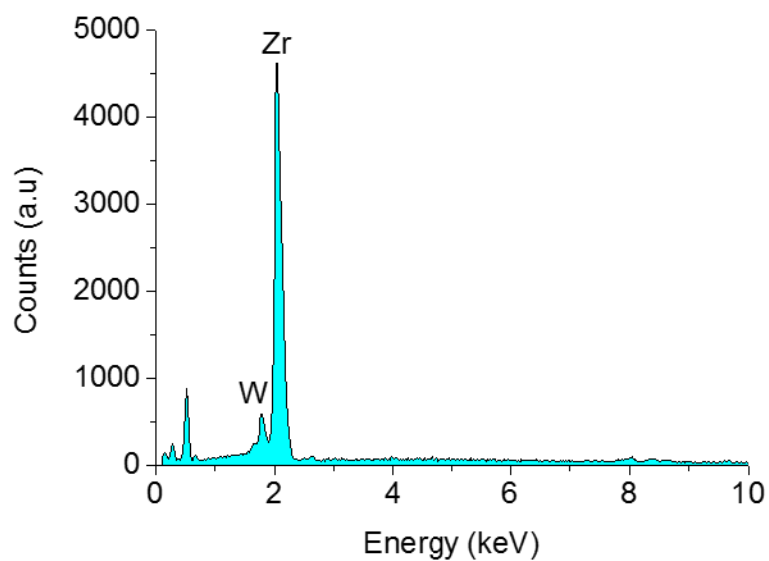

**Figure S6.** Typical EDS-SEM microanalysis spectrum obtained from the ZrSTA(5) sample after catalytic reactions.

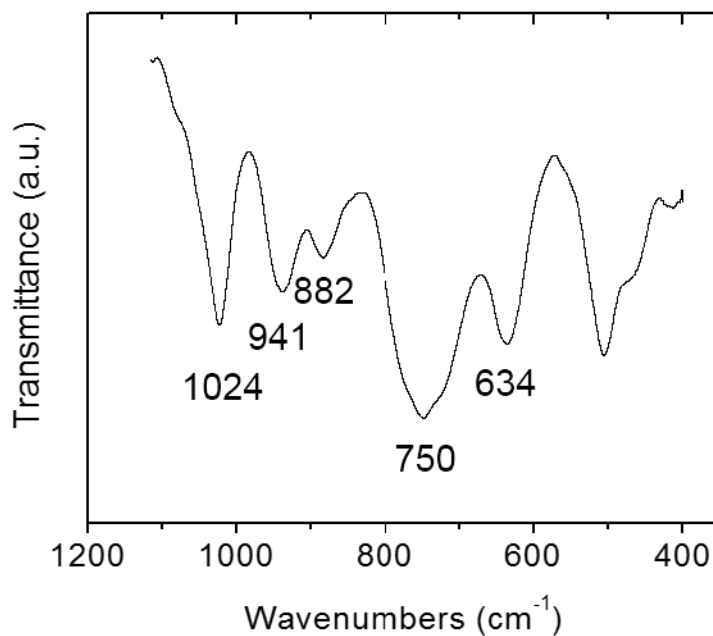

**Figure S7.** IR spectrum of reused ZrSTA(5) catalyst, showing intense absorption peaks at  $\sim 1024$ ,  $\sim 941$  and  $\sim 882$   $\text{cm}^{-1}$  that are attributed to the stretching vibrations of Si–O, W=O<sub>d</sub> and W–O<sub>b</sub>–W bonds in the [SiW<sub>12</sub>O<sub>40</sub>]<sup>4-</sup> Keggin clusters. The strong absorption peaks at  $\sim 750$  and  $\sim 634$   $\text{cm}^{-1}$  are assigned to the stretching vibration bands of Zr–O and Zr–O–Zr of zirconia matrix, respectively
